# Supplementary material
Source: PubMed Central journal article supplement (PMC6650293)
Supplement: EMS83347-supplement-Supplementary_Table_1.pdf [file EMS83347-supplement-Supplementary_Table_1.pdf]

**Supplementary Table 1:** Applications of population adjustment in NICE Technology Appraisals. Superscripts in the covariates column indicate the subset of covariates selected using the approach detailed in the adjacent column.

| Appraisal                                                                                                            | Date published | Population adjustment method | Anchored or unanchored comparison | Clinical area | Outcome type | Covariates                                                                                                                                                                                            | How were covariates chosen?                                                                                                                                                                                          | MAIC effective sample size (%) | If available, how was a larger network dealt with?                                   |
|----------------------------------------------------------------------------------------------------------------------|----------------|------------------------------|-----------------------------------|---------------|--------------|-------------------------------------------------------------------------------------------------------------------------------------------------------------------------------------------------------|----------------------------------------------------------------------------------------------------------------------------------------------------------------------------------------------------------------------|--------------------------------|--------------------------------------------------------------------------------------|
| TA510: Daratumumab monotherapy for treating relapsed and refractory multiple myeloma (17)                            | March 2018     | MAIC                         | Unanchored                        | Oncology      | Survival     | refractory status <sup>*†</sup> , ECOG <sup>*†</sup> , prior treatments <sup>*</sup> , creatinine clearance <sup>*</sup> , time since diagnosis, myeloma subtype, race, bone lesions, prior ASCT, age | Using literature review and expert opinion, covariates ranked by importance then forward selected. MAICs performed into two target trials, the first adjusting for 4 covariates (*), the second for 2 covariates (†) | 84 (57.8), 80 (54.1)           | Stand-alone comparisons                                                              |
| TA500: Ceritinib for untreated ALK-positive non-small-cell lung cancer (18)                                          | January 2018   | MAIC                         | Unanchored                        | Oncology      | Survival     | age, gender, race, smoking status, adenocarcinoma, ECOG, metastatic disease, brain metastases                                                                                                         | All baseline characteristics available in both trials                                                                                                                                                                | 171 (90.4), 174 (92.1)         | Stand-alone comparisons                                                              |
| TA492: Atezolizumab for untreated locally advanced or metastatic urothelial cancer when cisplatin is unsuitable (19) | December 2017  | STC, MAIC                    | Unanchored                        | Oncology      | Survival     | age <sup>*</sup> , gender <sup>*</sup> , ECOG <sup>*</sup> , liver metastases <sup>*</sup> , number of prior therapies                                                                                | STC selected covariates (*) to maximise cross-validated predictive performance. MAIC used all available covariates.                                                                                                  | -                              | Active arms predicted for each study to connect the network, then analysed using NMA |

Supplementary Table 1: (continued)

| Appraisal                                                                                                   | Date published | Population adjustment method | Anchored or unanchored comparison | Clinical area | Outcome type            | Covariates                                                                                                                                                     | How were covariates chosen?                                                                 | MAIC effective sample size (%) | If available, how was a larger network dealt with? |
|-------------------------------------------------------------------------------------------------------------|----------------|------------------------------|-----------------------------------|---------------|-------------------------|----------------------------------------------------------------------------------------------------------------------------------------------------------------|---------------------------------------------------------------------------------------------|--------------------------------|----------------------------------------------------|
| TA462: Nivolumab for treating relapsed or refractory classical Hodgkin lymphoma (20)                        | July 2017      | MAIC                         | Unanchored                        | Oncology      | Survival, Response rate | age, gender, disease stage, B symptoms, haemoglobin, lymphocytes, white cell count, albumin, extranodal site, ECOG, tumour diameter, number of prior therapies | -                                                                                           | 81 (42)                        | -                                                  |
| TA478: Brentuximab vedotin for treating relapsed or refractory systemic anaplastic large cell lymphoma (21) | October 2017   | MAIC                         | Unanchored                        | Oncology      | Survival                | age, gender, elevated lactate dehydrogenase, disease stage, ECOG, response to primary therapy                                                                  | All baseline characteristics available in both trials                                       | 4.8 (8.3)                      | -                                                  |
| TA457: Carfilzomib for previously treated multiple myeloma (22)                                             | July 2017      | MAIC                         | Unanchored                        | Oncology      | Survival                | age, ISS stage, time since diagnosis, creatinine clearance, number of prior therapies, prior SCT, prior bortezomib, prior IMiD, refractory to last therapy     | Covariates identified as prognostic factors by UK clinical experts reported in both studies | 335.5 (52)                     | -                                                  |

Supplementary Table 1: (continued)

| Appraisal                                                                                                                              | Date published | Population adjustment method | Anchored or unanchored comparison | Clinical area | Outcome type            | Covariates                                                   | How were covariates chosen?                           | MAIC effective sample size (%) | If available, how was a larger network dealt with? |
|----------------------------------------------------------------------------------------------------------------------------------------|----------------|------------------------------|-----------------------------------|---------------|-------------------------|--------------------------------------------------------------|-------------------------------------------------------|--------------------------------|----------------------------------------------------|
| TA449: Everolimus and sunitinib for treating unresectable or metastatic neuroendocrine tumours in people with progressive disease (23) | June 2017      | MAIC                         | Anchored                          | Oncology      | Survival                | -                                                            | -                                                     | -                              | -                                                  |
| TA451: Ponatinib for treating chronic myeloid leukaemia and acute lymphoblastic leukaemia (24)                                         | June 2017      | MAIC                         | Unanchored                        | Oncology      | Response rate, Duration | age, gender, T315I mutation, race, duration of disease, ECOG | All baseline characteristics available in both trials | 69 (25.8)                      | -                                                  |
| TA432: Everolimus for advanced renal cell carcinoma after previous treatment (25)                                                      | February 2017  | MAIC                         | Unanchored                        | Oncology      | Survival                | -                                                            | -                                                     | -                              | -                                                  |

Supplementary Table 1: (continued)

| Appraisal                                                                                                                                                 | Date published | Population adjustment method | Anchored or unanchored comparison | Clinical area | Outcome type | Covariates                                                                                                                                                                                             | How were covariates chosen?                                                                             | MAIC effective sample size (%) | If available, how was a larger network dealt with?                       |
|-----------------------------------------------------------------------------------------------------------------------------------------------------------|----------------|------------------------------|-----------------------------------|---------------|--------------|--------------------------------------------------------------------------------------------------------------------------------------------------------------------------------------------------------|---------------------------------------------------------------------------------------------------------|--------------------------------|--------------------------------------------------------------------------|
| TA429: Ibrutinib for previously treated chronic lymphocytic leukaemia and untreated chronic lymphocytic leukaemia with 17p deletion or TP53 mutation (26) | January 2017   | MAIC                         | Unanchored                        | Oncology      | Survival     | 17p deletion status, number of prior therapies, purine refractory status, age, binet/RAI, IGVH status, beta2-microglobulin, del 11q, creatinine clearance, platelets, gender, haemoglobin, lymphocytes | All clinically relevant baseline characteristics available in both trials, reviewed by clinical experts | 30 (15.4)                      | Stand-alone comparisons                                                  |
| TA427: Pomalidomide for multiple myeloma previously treated with lenalidomide and bortezomib (27)                                                         | January 2017   | MAIC                         | Unanchored                        | Oncology      | Survival     | age, ECOG, number of prior therapies, prior thalidomide                                                                                                                                                | -                                                                                                       | -                              | Other single-arm IPD sources used for additional stand-alone comparisons |
| TA410: Talimogene laherparepvec for treating unresectable metastatic melanoma (28)                                                                        | September 2016 | Prediction model             | Unanchored                        | Oncology      | Survival     | gender, ECOG, visceral status, brain metastases, LDH                                                                                                                                                   | Modification of published prediction model (Korn model)                                                 | -                              | -                                                                        |

Supplementary Table 1: (continued)

| Appraisal                                                                                                | Date published | Population adjustment method | Anchored or unanchored comparison | Clinical area | Outcome type         | Covariates                                                                                                                                               | How were covariates chosen?                                                                                                             | MAIC effective sample size (%) | If available, how was a larger network dealt with?                  |
|----------------------------------------------------------------------------------------------------------|----------------|------------------------------|-----------------------------------|---------------|----------------------|----------------------------------------------------------------------------------------------------------------------------------------------------------|-----------------------------------------------------------------------------------------------------------------------------------------|--------------------------------|---------------------------------------------------------------------|
| TA383: TNF-alpha inhibitors for ankylosing spondylitis and non-radiographic axial spondyloarthritis (29) | February 2016  | MAIC, STC                    | Anchored                          | Rheumatology  | Change from baseline | gender, race, age, concomitant DMARD, concomitant NSAID, HLA-B27, BASDAI, BASFI, ASDAS, CRP                                                              | All baseline characteristics available in both trials                                                                                   | -                              | Stand-alone comparisons                                             |
| TA380: Panobinostat for treating multiple myeloma after at least 2 previous treatments (30)              | January 2016   | MAIC                         | Unanchored                        | Oncology      | Survival             | age, gender, time since diagnosis, ECOG, number of prior therapies, prior thalidomide, prior bortezomib, prior stem cell transplant, beta2-microglobulin | All baseline characteristics available in both trials                                                                                   | 137 (35.4), 23 (5.9)           | Network of studies available, MAIC used to target single comparison |
| TA364: Daclatasvir for treating chronic hepatitis C (31)                                                 | November 2015  | MAIC                         | Unanchored                        | Hepatology    | Rate                 | age, BMI, race, gender, HCV genotype, plasma HCV RNA, fibrosis staging, IL28B genotype, platets, ALT, previous treatment                                 | All baseline characteristics available in both trials<br>One MAIC only had sufficient sample size to adjust for one covariate (HCV RNA) | -                              | Unclear                                                             |

Supplementary Table 1: (continued)

| Appraisal                                                                                                                               | Date published | Population adjustment method | Anchored or unanchored comparison | Clinical area | Outcome type  | Covariates                                                                                                                                                           | How were covariates chosen?                                                                             | MAIC effective sample size (%) | If available, how was a larger network dealt with?                  |
|-----------------------------------------------------------------------------------------------------------------------------------------|----------------|------------------------------|-----------------------------------|---------------|---------------|----------------------------------------------------------------------------------------------------------------------------------------------------------------------|---------------------------------------------------------------------------------------------------------|--------------------------------|---------------------------------------------------------------------|
| TA331: Simeprevir in combination with peginterferon alfa and ribavirin for treating genotypes 1 and 4 chronic hepatitis C (32)          | February 2015  | MAIC                         | Unanchored                        | Hepatology    | Rate          | fibrosis score, viral load, BMI, age, gender                                                                                                                         | -                                                                                                       | 15 (14)                        | Stand-alone comparisons                                             |
| TA333: Axitinib for treating advanced renal cell carcinoma after failure of prior systemic treatment (33)                               | February 2015  | STC                          | Unanchored                        | Oncology      | Survival      | gender, age*, nephrectomy status, previous radiotherapy, previous cytokine therapy, MSKCC* <sup>†</sup> , clear cell carcinoma, ECOG, time on subitinib <sup>†</sup> | Significant predictors of outcome in regression model ( $p < 0.1$ ) for PFS (*) and OS ( <sup>†</sup> ) | -                              | -                                                                   |
| TA311: Bortezomib for induction therapy in multiple myeloma before high-dose chemotherapy and autologous stem cell transplantation (34) | April 2014     | MAIC                         | Unanchored                        | Oncology      | Response rate | ISS stage, beta2-microglobulin, cytogenetic abnormality t4, age, gender, light chain myeloma, IG-A, IG-D, IG-G                                                       | -                                                                                                       | -                              | Network of studies available, MAIC used to target single comparison |
